# Supplementary material for: Phylogenomics and sequence-structure-function relationships in the GmrSD family of Type IV restriction enzymes
Source: PubMed Central journal article supplement (PMC4619093; doi:10.1186/s12859-015-0773-z), 2015-10-23
Supplement: 12859_2015_773_MOESM9_ESM.pdf [file 12859_2015_773_MOESM9_ESM.pdf]

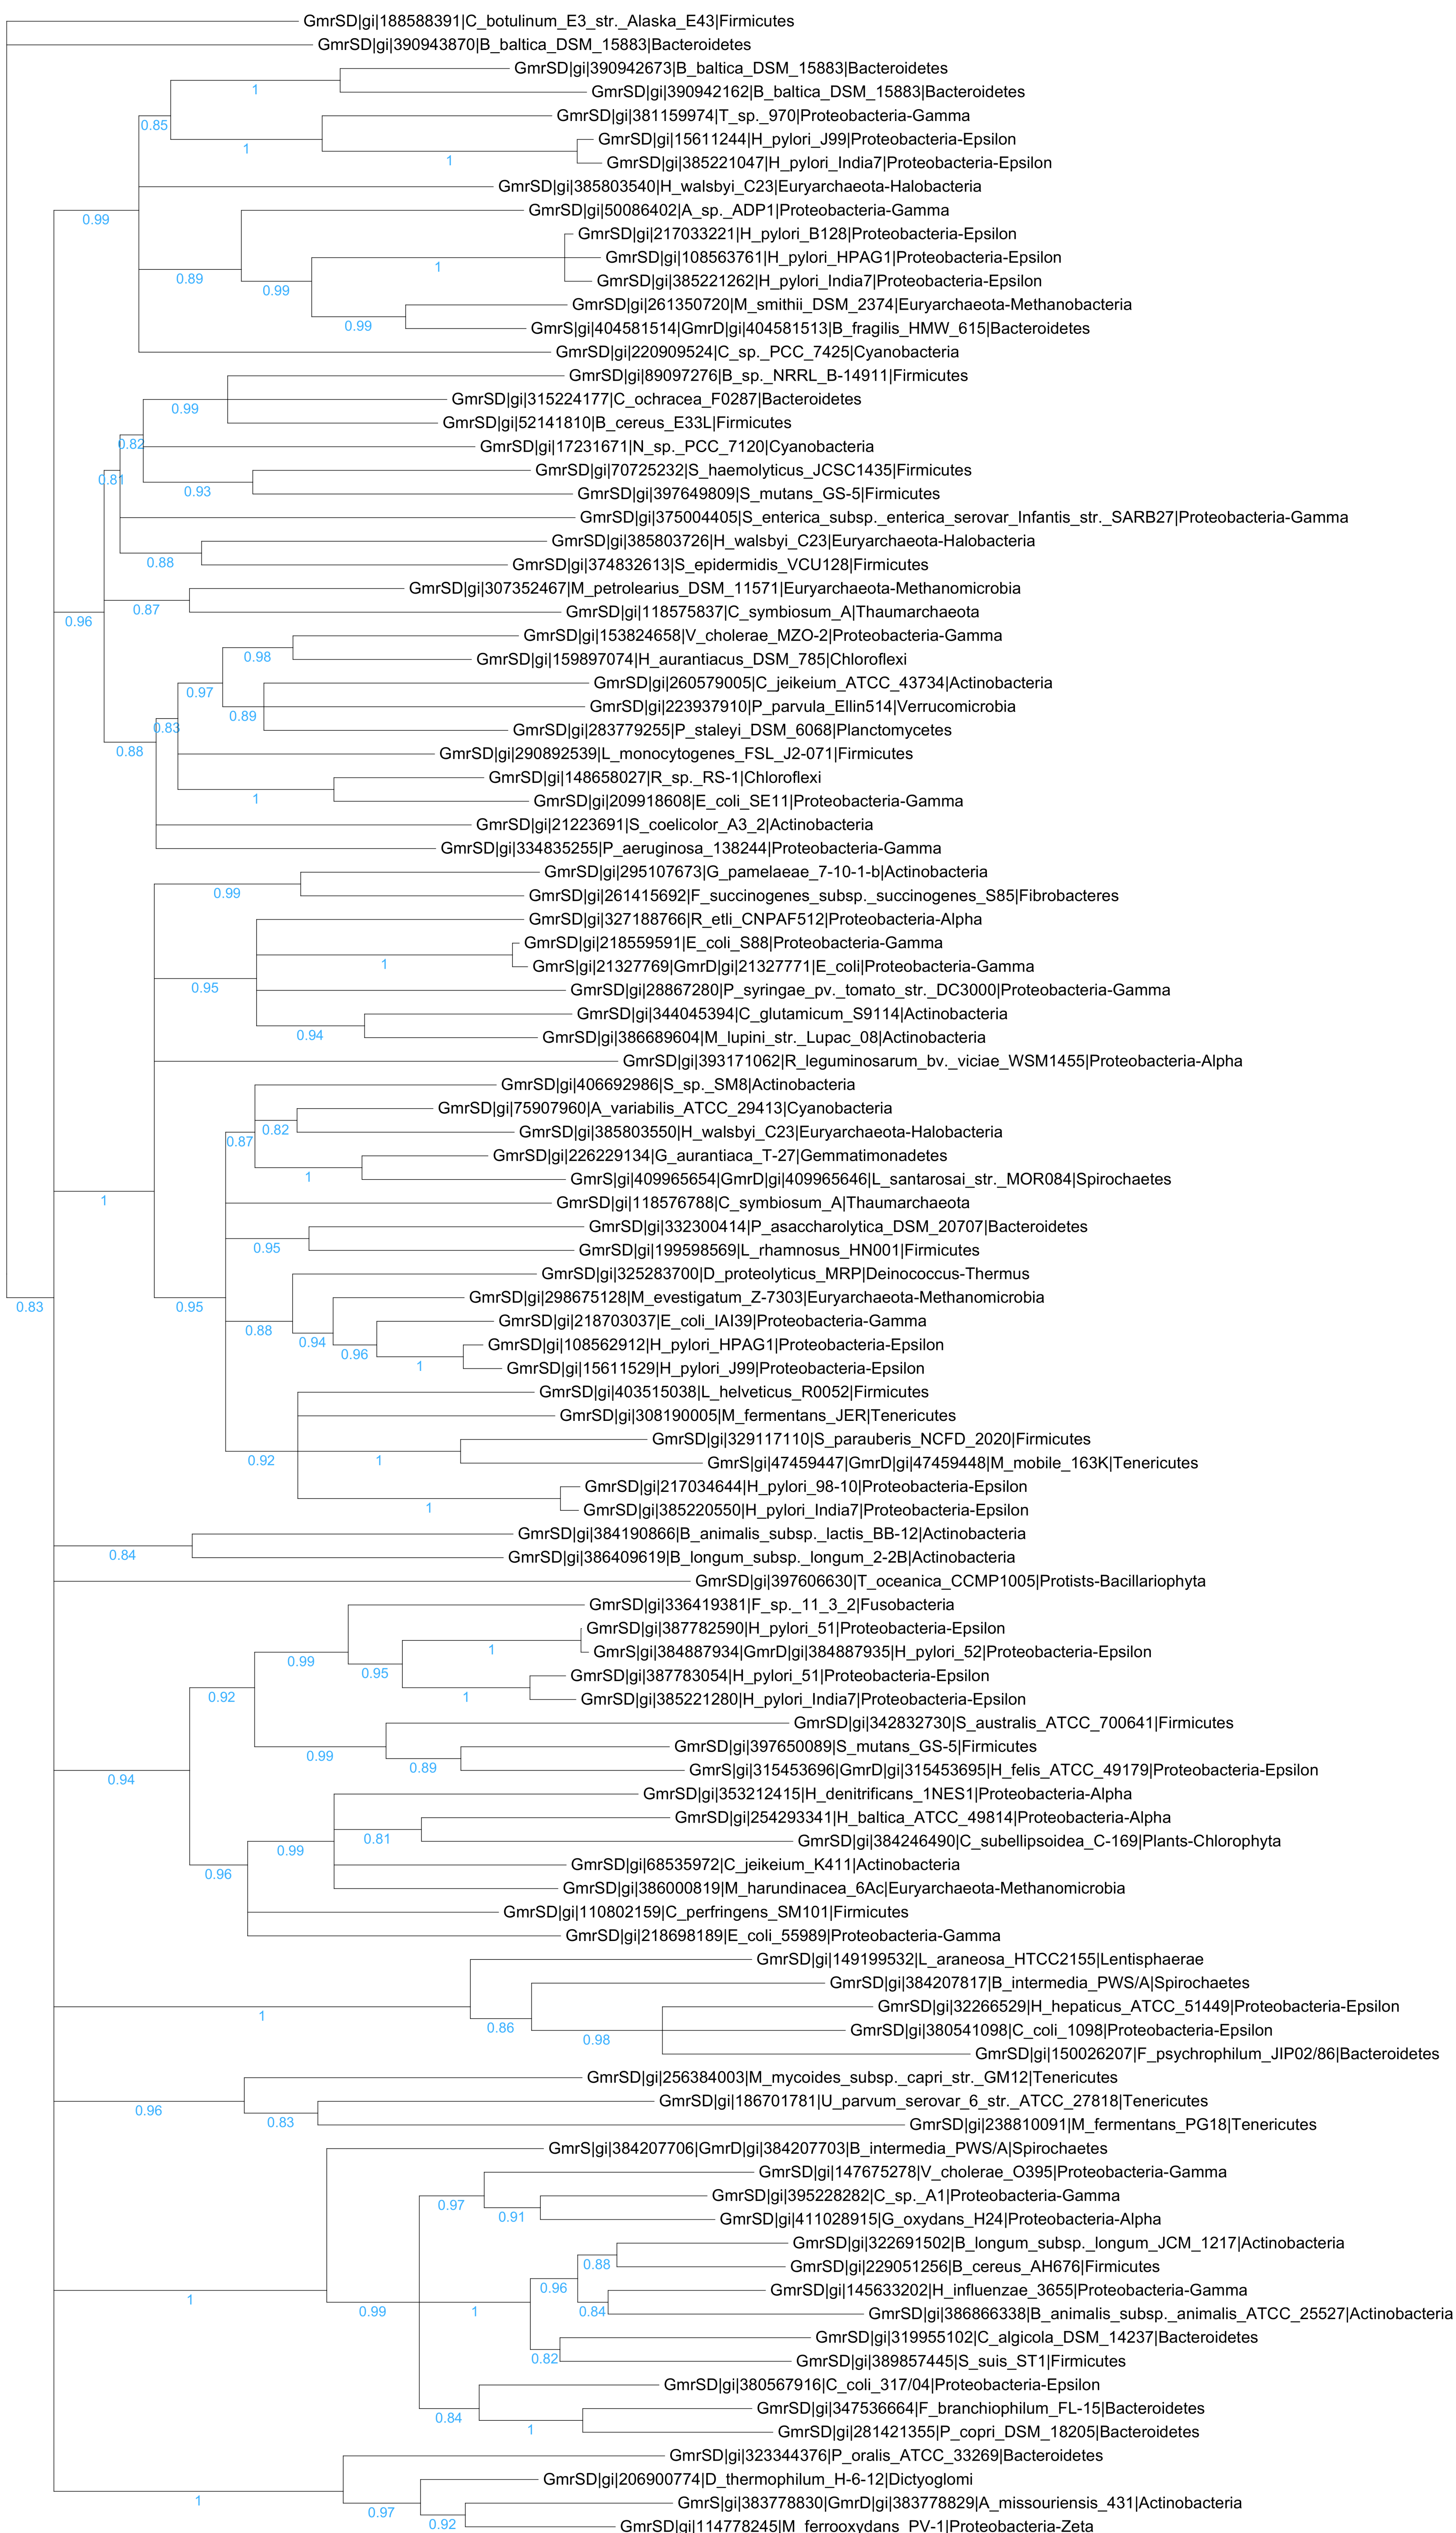

**Supplementary Figure 3 The phylogenetic tree of double-domain GmrSD sequences**

Phylogenetic tree calculated for sequences of double-domain GmrSD proteins and single-domain GmrS-GmrD pairs treated as one sequence. Clades with SH-like support values below 80% were collapsed. The tree was calculated using approximated maximum-likelihood approach implemented in FastTree .
